# Supplementary material
Source: Springer Nature journal article supplement (https://www.springermedizin.de/resource/supplementary/12981_2011_215_MOESM1_ESM.pdf/9604072)
Supplement: MOESM1 [file 9604072]

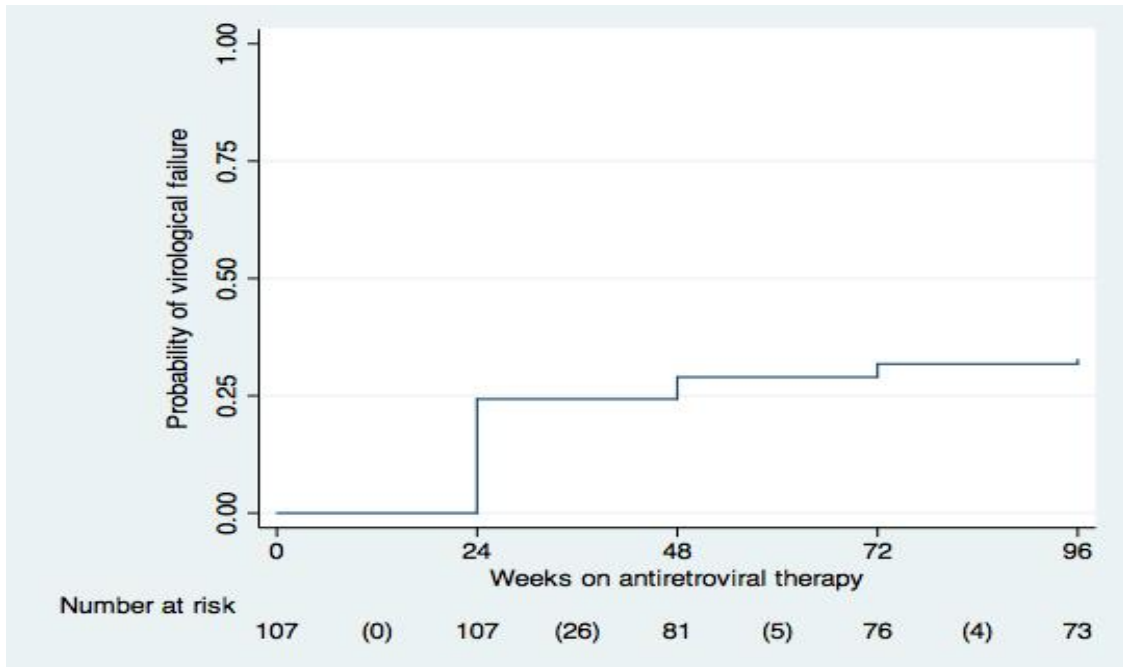

Numbers of failure are shown in parentheses.

Virologic failure was defined as  $\text{HIV-RNA} \geq 1,000$  copies/ml
